# Supplementary material for: The Potential of the Marine Microalga Diacronema lutheri in the Prevention of Obesity and Metabolic Syndrome in High-Fat-Fed Wistar Rats
Source: MDPI journal article supplement (doi:10.3390/molecules27134246), 2022-06-30
Supplement: s1 [file s1]

## Supplementary materials

**Table S1.** Biochemical composition of standard and high fat diets and freeze-dried *D. lutheri* biomass

| Nutrients (g/100g)          | CTRL* | HF* | Dia   |      |
|-----------------------------|-------|-----|-------|------|
|                             |       |     | Mean  | SD   |
| Proteins                    | 16    | 19  | 35.4  | 0.64 |
| Carbohydrates               | 60    | 32  | 13.46 | 0.48 |
| Lipids                      | 4     | 36  | 28.6  |      |
| Mineral and vitamin mixture | 5     | 5   | -     |      |
| DF                          | 4     | -   | -     |      |
| Humidity                    | 11    | 8   | 2.23  | 0.07 |
| Ash                         | -     | -   | 22.6  | 0.66 |

CTRL, standard diet; DF, dietary fiber; Dia, freeze-dried biomass of *D. lutheri*; HF, high fat diet; -, not determined. For CTRL diet, the mineral mixture provides the following amounts in mg/kg of diet: C, 7300; Cl, 4000; Cu, 16; Fe, 270; K, 6000; Mg, 1600; Mn, 70; Na, 2500; P, 5500; Zn, 55. The vitamin mixture of CTRL diet provides the following amounts in mg/kg of diet: biotin, 0.04; choline, 1600; folic acid, 0.5; niacin, 75; vitamin A, 7500; vitamin B1, 7; vitamin B2, 6.5; vitamin B5, 16.5; vitamin B6, 2.6; vitamin B12, 0.02; vitamin D3, 1000; vitamin E, 30; vitamin K3, 2.5. For HF diet the mineral mixture provides the following amounts in mg/kg of diet: Ca, 3000; Na, 4100; P, 5000. Results are represented as mean values  $\pm$  SD, n = 3 for proteins, carbohydrates, humidity and ash of Dia biomass. \* Data of biochemical composition of control and high fat diets have been furnished by SAFE.

**Table S2.** Fatty acid composition of diets

|                    | <b>CTRL</b>      | <b>HF</b>        | <b>Dia</b>      |
|--------------------|------------------|------------------|-----------------|
|                    | <b>(% molar)</b> | <b>(% molar)</b> | <b>(g/100g)</b> |
| Fatty acid         | Mean             | Mean             | Mean            |
| 4:0                | -                | 1.49             | ND              |
| 8:0                | -                | 1.20             | ND              |
| 10:0               | -                | 3.07             | ND              |
| 12:0               | -                | 3.95             | ND              |
| 14:0               | 0.63             | 13.16            | 1.88            |
| 14:1               | -                | -                | 0.06            |
| 15:0               | -                | -                | 0.03            |
| 16:0               | 15.91            | 32.87            | 0.02            |
| 16:1n-7            | 0.73             | -                | 1.48            |
| 16:2n-6            | -                | -                | 0.90            |
| 16:3n-3            | -                | -                | ND              |
| 16:3n-6            | -                | -                | ND              |
| 16:4n-1            | -                | -                | ND              |
| 16:4n-6            | -                | -                | ND              |
| 18:0               | 2.00             | 13.32            | ND              |
| 18:1n-7            | -                | -                | ND              |
| 18:1n-9            | 21.44            | 16.92            | 1.72            |
| 18:2n-6            | 49.84            | 5.44             | 0.5             |
| 18:3n-3            | 4.23             | -                | 1.11            |
| 18:3n-6            | -                | -                | 0.05            |
| 18:4n-3            | 1.28             | -                | 2.32            |
| 20:0               | -                | -                | 0.02            |
| 20:2n-6            | -                | -                | 0.03            |
| 20:3n-3            | -                | -                | 0.05            |
| 20:4n-3            | -                | -                | ND              |
| 20:4 n-6           | -                | -                | 0.04            |
| 20:5 n-3           | 0.66             | -                | 0.22            |
| 22:0               | -                | -                | 0.04            |
| 22:1               | -                | -                | 0.04            |
| 22:5n-3            | 0.91             | -                | ND              |
| 22:5n-6            | -                | -                | 0.19            |
| 22:6n-3            | 1.03             | -                | 1.33            |
| 24:0               | -                | -                | 0.02            |
| Others             | 1.24             | 8.58             | 0.02            |
| Total SFA          | 18.54            | 69.06            | 3.58            |
| Total MUFA         | 22.17            | 16.92            | 2.76            |
| Total PUFA         | 58.05            | 5.44             | 5.85            |
| Total n-3 PUFA     | 8.11             | -                | 5.04            |
| Total n-6 PUFA     | 49.94            | 5.46             | 0.82            |
| n-6 PUFA/ n-3 PUFA | 0.16             | -                | 6.15            |
| Total fatty acids  | 98.76            | 91.42            | 12.2            |

CTRL, standard diet; HF, high fat diet; ND, not detected; Dia, freeze-dried biomass of *D. lutheri*; -, not determined. Results are represented as mean values  $\pm$  SD, n = 3 for Dia biomass. Mean values (n = 2) were reported, no statistical analysis were carried out, no SD mentioned.

**Table S3.** Pigment and sterol composition, antioxidant activity and *in vitro* digestibility of freeze-dried *D. lutheri* biomass

| Pigments (g/100g)                                                         | Dia                   |                       |
|---------------------------------------------------------------------------|-----------------------|-----------------------|
|                                                                           | Mean                  | SD                    |
| Total chlorophyll                                                         | 1.82                  | 0.88 10 <sup>-1</sup> |
| Chlorophyll- <i>a</i>                                                     | 1.27                  | 0.35 10 <sup>-1</sup> |
| Chlorophyll- <i>c</i>                                                     | 0.54                  | 0.52 10 <sup>-1</sup> |
| Total carotenoids                                                         | 0.62                  | 0.17 10 <sup>-1</sup> |
| Carotenoids (g/100g)                                                      |                       |                       |
| Fucoxanthin                                                               | 3.34 10 <sup>-1</sup> |                       |
| 4k-hex-fucoxanthin                                                        | 1.73 10 <sup>-1</sup> |                       |
| Dinoxanthin                                                               | 4.00 10 <sup>-2</sup> |                       |
| β-carotene                                                                | 1.50 10 <sup>-2</sup> |                       |
| Others                                                                    | 6.20 10 <sup>-2</sup> |                       |
| Sterols (g/100g)                                                          |                       |                       |
| Cholesterol                                                               | 8.37 10 <sup>-3</sup> |                       |
| Brassicasterol                                                            | 7.00 10 <sup>-1</sup> |                       |
| 24-Metilcholesterol                                                       | 7.32 10 <sup>-3</sup> |                       |
| Campesterol                                                               | 5.23 10 <sup>-3</sup> |                       |
| Stigmasterol                                                              | 1.44 10 <sup>-1</sup> |                       |
| Fucoesterol                                                               | 1.78 10 <sup>-1</sup> |                       |
| Δ-5 Avenastérol                                                           | 3.14 10 <sup>-3</sup> |                       |
| Total sterols                                                             | 1.046                 |                       |
| Antioxidant activity*                                                     |                       |                       |
| Antiradical activity DPPH (I <sub>50</sub> )†<br>(mg biomass/ml extract)‡ | 0.33                  |                       |
| Antioxydant activity ORAC<br>(μmol TE/mg biomass)§                        | 27.4                  |                       |
| <i>In vitro</i> digestibility (% dry matter)                              | 70.9 ± 3.08           |                       |

\* Antioxidant activity was measured from extracts of Dia in 90% acetone. † I<sub>50</sub>: concentration of the biomass/mL extract decreasing the absorbance of the DPPH solution by 50%. ‡ DPPH is a stable radical that can be reduced by reaction with an antiradical hydrogen-donor compound. § Trolox: water-soluble vitamin E analogue. 1 ORAC unit equals the net protection produced by 1 μM Trolox. DPPH, 2, 2-diphenyl-1-picrylhydrazyl; ORAC, Oxygen-radical absorbance capacity; TE, Trolox equivalent; Dia, freeze-dried of *D. lutheri*. Results are represented as mean values ± SD (not reported), n = 3, excepted for sterol composition (n = 1).
